# Supplementary material for: Preparing a pseudo-solid by the reinforcement of a polydentate thioether using silver nanoparticles
Source: Royal Society of Chemistry journal article supplement (doi:10.1039/c4nr06834c), 2014-12-15
Supplement: c4nr06834c3.pdf [file c4nr06834c3.pdf]

**Description for Video** „Flow behavior of silver nanoparticle-reinforced poly(propylene sulfide)“:

The viscoelasticity of silver nanoparticle-reinforced poly(propylene sulfide) is strongly dependent on the particle filling fraction. A five days time lapse is presented.

**Keywords:** silver nanoparticles, reinforcement, viscoelasticity, flow behavior, nanocomposite, time lapse
